# Supplementary material
Source: MDPI journal article supplement (https://www.mdpi.com/2304-6740/6/4/134)

# checkCIF/PLATON report

You have not supplied any structure factors. As a result the full set of tests cannot be run.

THIS REPORT IS FOR GUIDANCE ONLY. IF USED AS PART OF A REVIEW PROCEDURE FOR PUBLICATION, IT SHOULD NOT REPLACE THE EXPERTISE OF AN EXPERIENCED CRYSTALLOGRAPHIC REFEREE.

No syntax errors found.      CIF dictionary      Interpreting this report

## Datablock: s2601lm\_sq

---

|                 |                                                |                                    |
|-----------------|------------------------------------------------|------------------------------------|
| Bond precision: | C-C = 0.0146 A                                 | Wavelength=0.71073                 |
| Cell:           | a=12.1254(10)                                  | b=13.9304(12)      c=40.007(3)     |
|                 | alpha=90                                       | beta=93.564(4)      gamma=90       |
| Temperature:    | 130 K                                          |                                    |
|                 | Calculated                                     | Reported                           |
| Volume          | 6744.6(10)                                     | 6744.6(10)                         |
| Space group     | P 21/n                                         | P 21/n                             |
| Hall group      | : -P 2yn                                       | -P 2yn                             |
| Moiety formula  | C64 H48 Cu N4 O P2, F6 P, C H2 Cl2 [+ solvent] | C64 H48 Cu N4 O P2, F6 P, C H2 Cl2 |
| Sum formula     | C65 H50 Cl2 Cu F6 N4 O P3 [+ solvent]          | C65 H50 Cl2 Cu F6 N4 O P3          |
| Mr              | 1244.45                                        | 1244.44                            |
| Dx, g cm-3      | 1.226                                          | 1.226                              |
| Z               | 4                                              | 4                                  |
| Mu (mm-1)       | 0.532                                          | 0.532                              |
| F000            | 2552.0                                         | 2552.0                             |
| F000'           | 2556.73                                        |                                    |
| h,k,lmax        | 14,16,48                                       | 14,16,48                           |
| Nref            | 12525                                          | 12284                              |
| Tmin,Tmax       | 0.873,0.905                                    | 0.480,0.728                        |
| Tmin'           | 0.850                                          |                                    |

Correction method= # Reported T Limits: Tmin=0.480 Tmax=0.728  
AbsCorr = NUMERICAL

Data completeness= 0.981      Theta(max)= 25.473

R(reflections)= 0.1232( 6409)      wR2(reflections)= 0.2824( 12284)

S = 1.047      Npar= 741

---

The following ALERTS were generated. Each ALERT has the format

**test-name\_ALERT\_alert-type\_alert-level.**

Click on the hyperlinks for more details of the test.

### ● Alert level B

PLAT260\_ALERT\_2\_B Large Average Ueq of Residue Including P3 0.167 Check

### ● Alert level C

|                   |                                                    |         |        |
|-------------------|----------------------------------------------------|---------|--------|
| PLAT082_ALERT_2_C | High R1 Value .....                                | 0.12    | Report |
| PLAT084_ALERT_3_C | High wR2 Value (i.e. > 0.25) .....                 | 0.28    | Report |
| PLAT220_ALERT_2_C | Non-Solvent Resd 1 C Ueq(max)/Ueq(min) Range       | 3.1     | Ratio  |
| PLAT230_ALERT_2_C | Hirshfeld Test Diff for C61 --C62 .                | 5.1     | s.u.   |
| PLAT234_ALERT_4_C | Large Hirshfeld Difference P2 --C53 .              | 0.16    | Ang.   |
| PLAT234_ALERT_4_C | Large Hirshfeld Difference N3 --C13 .              | 0.18    | Ang.   |
| PLAT234_ALERT_4_C | Large Hirshfeld Difference C7 --C8 .               | 0.17    | Ang.   |
| PLAT234_ALERT_4_C | Large Hirshfeld Difference C9 --C10 .              | 0.16    | Ang.   |
| PLAT234_ALERT_4_C | Large Hirshfeld Difference C15 --C16 .             | 0.17    | Ang.   |
| PLAT234_ALERT_4_C | Large Hirshfeld Difference C18 --C19 .             | 0.20    | Ang.   |
| PLAT234_ALERT_4_C | Large Hirshfeld Difference C23 --C24 .             | 0.19    | Ang.   |
| PLAT234_ALERT_4_C | Large Hirshfeld Difference C32 --C33 .             | 0.19    | Ang.   |
| PLAT234_ALERT_4_C | Large Hirshfeld Difference C32 --C34 .             | 0.18    | Ang.   |
| PLAT234_ALERT_4_C | Large Hirshfeld Difference C49 --C50 .             | 0.16    | Ang.   |
| PLAT234_ALERT_4_C | Large Hirshfeld Difference C53 --C58 .             | 0.22    | Ang.   |
| PLAT234_ALERT_4_C | Large Hirshfeld Difference C54 --C55 .             | 0.17    | Ang.   |
| PLAT241_ALERT_2_C | High 'MainMol' Ueq as Compared to Neighbors of C8  |         | Check  |
| PLAT241_ALERT_2_C | High 'MainMol' Ueq as Compared to Neighbors of C51 |         | Check  |
| PLAT241_ALERT_2_C | High 'MainMol' Ueq as Compared to Neighbors of C58 |         | Check  |
| PLAT241_ALERT_2_C | High 'MainMol' Ueq as Compared to Neighbors of C61 |         | Check  |
| PLAT242_ALERT_2_C | Low 'MainMol' Ueq as Compared to Neighbors of C47  |         | Check  |
| PLAT242_ALERT_2_C | Low 'MainMol' Ueq as Compared to Neighbors of C53  |         | Check  |
| PLAT244_ALERT_4_C | Low 'Solvent' Ueq as Compared to Neighbors of C1X  |         | Check  |
| PLAT250_ALERT_2_C | Large U3/U1 Ratio for Average U(i,j) Tensor ...    | 2.3     | Note   |
| PLAT260_ALERT_2_C | Large Average Ueq of Residue Including C11X        | 0.138   | Check  |
| PLAT341_ALERT_3_C | Low Bond Precision on C-C Bonds .....              | 0.01462 | Ang.   |

### ● Alert level G

|                   |                                                    |       |        |
|-------------------|----------------------------------------------------|-------|--------|
| PLAT003_ALERT_2_G | Number of Uiso or Uij Restrained non-H Atoms ...   | 9     | Report |
| PLAT083_ALERT_2_G | SHELXL Second Parameter in WGHT Unusually Large    | 58.00 | Why ?  |
| PLAT186_ALERT_4_G | The CIF-Embedded .res File Contains ISOR Records   | 2     | Report |
| PLAT244_ALERT_4_G | Low 'Solvent' Ueq as Compared to Neighbors of      | P3    | Check  |
| PLAT606_ALERT_4_G | VERY LARGE Solvent Accessible VOID(S) in Structure | !     | Info   |
| PLAT720_ALERT_4_G | Number of Unusual/Non-Standard Labels .....        | 2     | Note   |
| PLAT860_ALERT_3_G | Number of Least-Squares Restraints .....           | 54    | Note   |
| PLAT869_ALERT_4_G | ALERTS Related to the Use of SQUEEZE Suppressed    | !     | Info   |
| PLAT933_ALERT_2_G | Number of OMIT Records in Embedded .res File ...   | 2     | Note   |

0 **ALERT level A** = Most likely a serious problem - resolve or explain

1 **ALERT level B** = A potentially serious problem, consider carefully

26 **ALERT level C** = Check. Ensure it is not caused by an omission or oversight

9 **ALERT level G** = General information/check it is not something unexpected

0 ALERT type 1 CIF construction/syntax error, inconsistent or missing data

15 ALERT type 2 Indicator that the structure model may be wrong or deficient

3 ALERT type 3 Indicator that the structure quality may be low

18 ALERT type 4 Improvement, methodology, query or suggestion

0 ALERT type 5 Informative message, check

## Validation response form

Please find below a validation response form (VRF) that can be filled in and pasted into your CIF.

```
# start Validation Reply Form
_vrf_PLAT082_s26011m_sq
;
PROBLEM: High R1 Value ..... 0.12 Report
RESPONSE: ...
;
_vrf_PLAT084_s26011m_sq
;
PROBLEM: High wR2 Value (i.e. > 0.25) ..... 0.28 Report
RESPONSE: ...
;
_vrf_PLAT220_s26011m_sq
;
PROBLEM: Non-Solvent Resd 1 C Ueq(max)/Ueq(min) Range 3.1 Ratio
RESPONSE: ...
;
_vrf_PLAT230_s26011m_sq
;
PROBLEM: Hirshfeld Test Diff for C61 --C62 . 5.1 s.u.
RESPONSE: ...
;
_vrf_PLAT234_s26011m_sq
;
PROBLEM: Large Hirshfeld Difference P2 --C53 . 0.16 Ang.
RESPONSE: ...
;
_vrf_PLAT241_s26011m_sq
;
PROBLEM: High 'MainMol' Ueq as Compared to Neighbors of C8 Check
RESPONSE: ...
;
_vrf_PLAT242_s26011m_sq
;
PROBLEM: Low 'MainMol' Ueq as Compared to Neighbors of C47 Check
RESPONSE: ...
;
_vrf_PLAT244_s26011m_sq
;
PROBLEM: Low 'Solvent' Ueq as Compared to Neighbors of C1X Check
RESPONSE: ...
;
_vrf_PLAT250_s26011m_sq
;
PROBLEM: Large U3/U1 Ratio for Average U(i,j) Tensor .... 2.3 Note
RESPONSE: ...
;
_vrf_PLAT260_s26011m_sq
;
PROBLEM: Large Average Ueq of Residue Including C11X 0.138 Check
RESPONSE: ...
;
_vrf_PLAT341_s26011m_sq
;
PROBLEM: Low Bond Precision on C-C Bonds ..... 0.01462 Ang.
RESPONSE: ...
;
# end Validation Reply Form
```

---

It is advisable to attempt to resolve as many as possible of the alerts in all categories. Often the minor alerts point to easily fixed oversights, errors and omissions in your CIF or refinement strategy, so attention to these fine details can be worthwhile. In order to resolve some of the more serious problems it may be necessary to carry out additional measurements or structure refinements. However, the purpose of your study may justify the reported deviations and the more serious of these should normally be commented upon in the discussion or experimental section of a paper or in the "special\_details" fields of the CIF. checkCIF was carefully designed to identify outliers and unusual parameters, but every test has its limitations and alerts that are not important in a particular case may appear. Conversely, the absence of alerts does not guarantee there are no aspects of the results needing attention. It is up to the individual to critically assess their own results and, if necessary, seek expert advice.

### **Publication of your CIF in IUCr journals**

A basic structural check has been run on your CIF. These basic checks will be run on all CIFs submitted for publication in IUCr journals (*Acta Crystallographica*, *Journal of Applied Crystallography*, *Journal of Synchrotron Radiation*); however, if you intend to submit to *Acta Crystallographica Section C* or *E* or *IUCrData*, you should make sure that full publication checks are run on the final version of your CIF prior to submission.

### **Publication of your CIF in other journals**

Please refer to the *Notes for Authors* of the relevant journal for any special instructions relating to CIF submission.

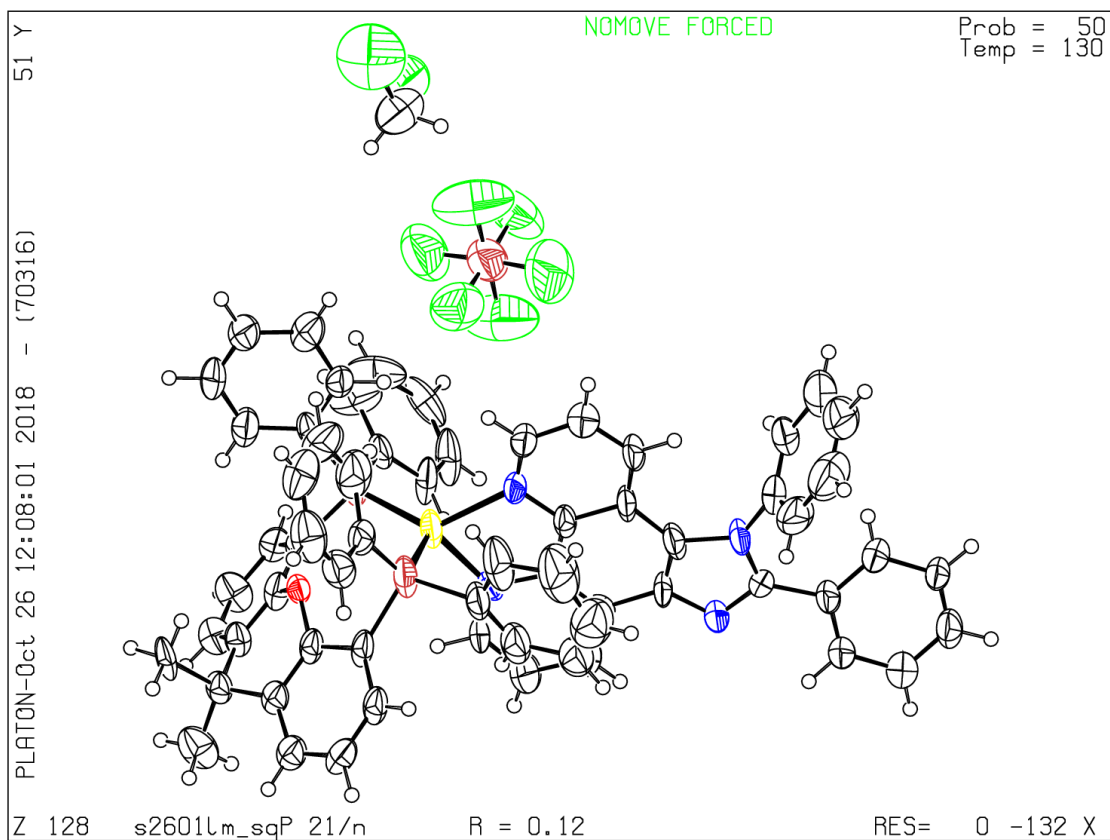

Supplement: s1 [file s1]
