# Supplementary material
Source: MDPI journal article supplement (https://www.mdpi.com/2304-6740/6/4/134)
Supplement: s1 [file s1]

# **Supplementary Materials: Imidazo-Phenanthroline Ligands as a Convenient Modular Platform for the Preparation of Heteroleptic Cu(I) Photosensitizers**

Marie-Ann Schmid, Martin Rentschler, Wolfgang Frey, Stefanie Tschierlei \* and Michael Karnahl \*

## **Table of Contents**

|          |                                                                 |          |
|----------|-----------------------------------------------------------------|----------|
| <b>1</b> | NMR spectra of the complexes <b>C1–C4</b>                       | page S2  |
| <b>2</b> | Mass spectra of the complexes <b>C1–C4</b>                      | page S6  |
| <b>3</b> | Crystallographic data and structures of <b>C1</b> and <b>C2</b> | page S8  |
| <b>4</b> | Emission lifetimes of the complexes <b>C1–C4</b> and <b>R1</b>  | page S11 |

## 1. NMR Spectra of the Complexes C1–C4

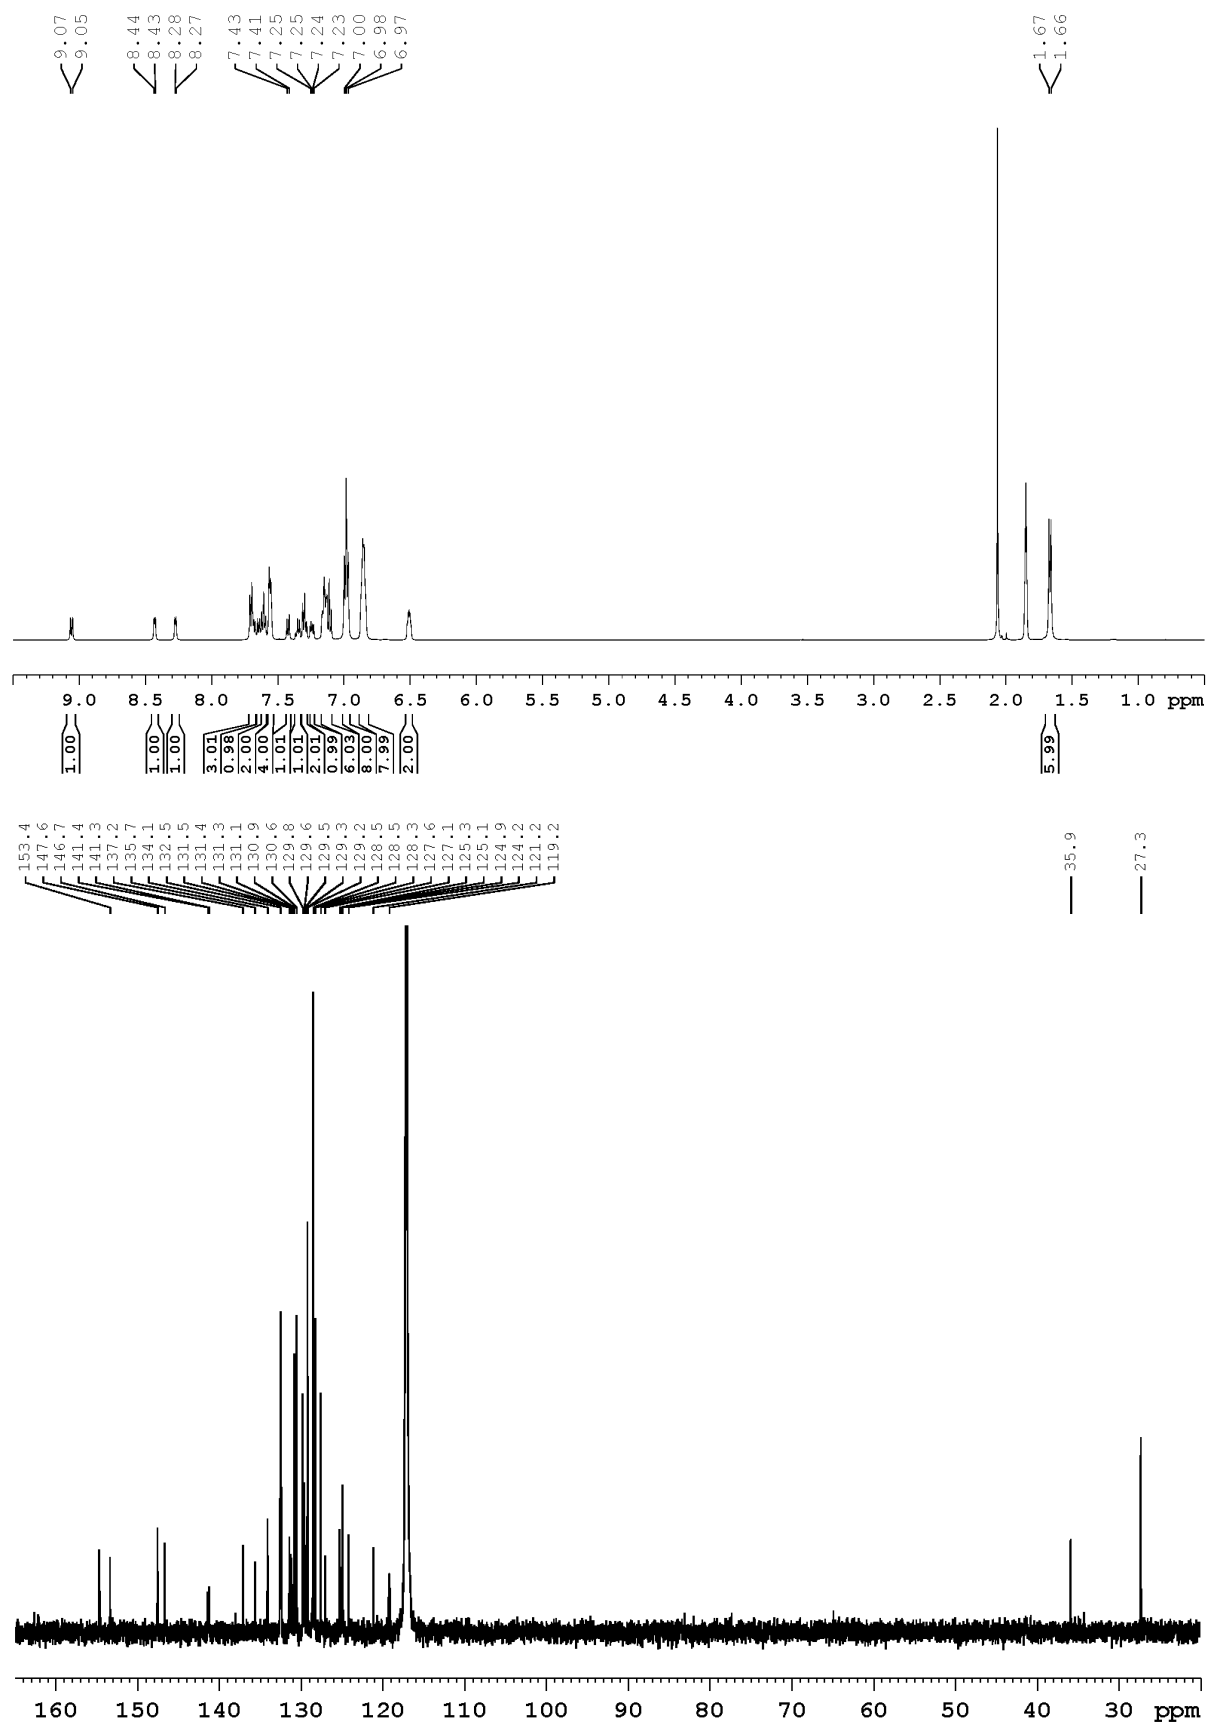

**Figure S1.** Presentation of the <sup>1</sup>H-NMR (top, 500 MHz) and <sup>13</sup>C-NMR (bottom, 126 MHz) spectra of C1 in CD<sub>3</sub>CN.

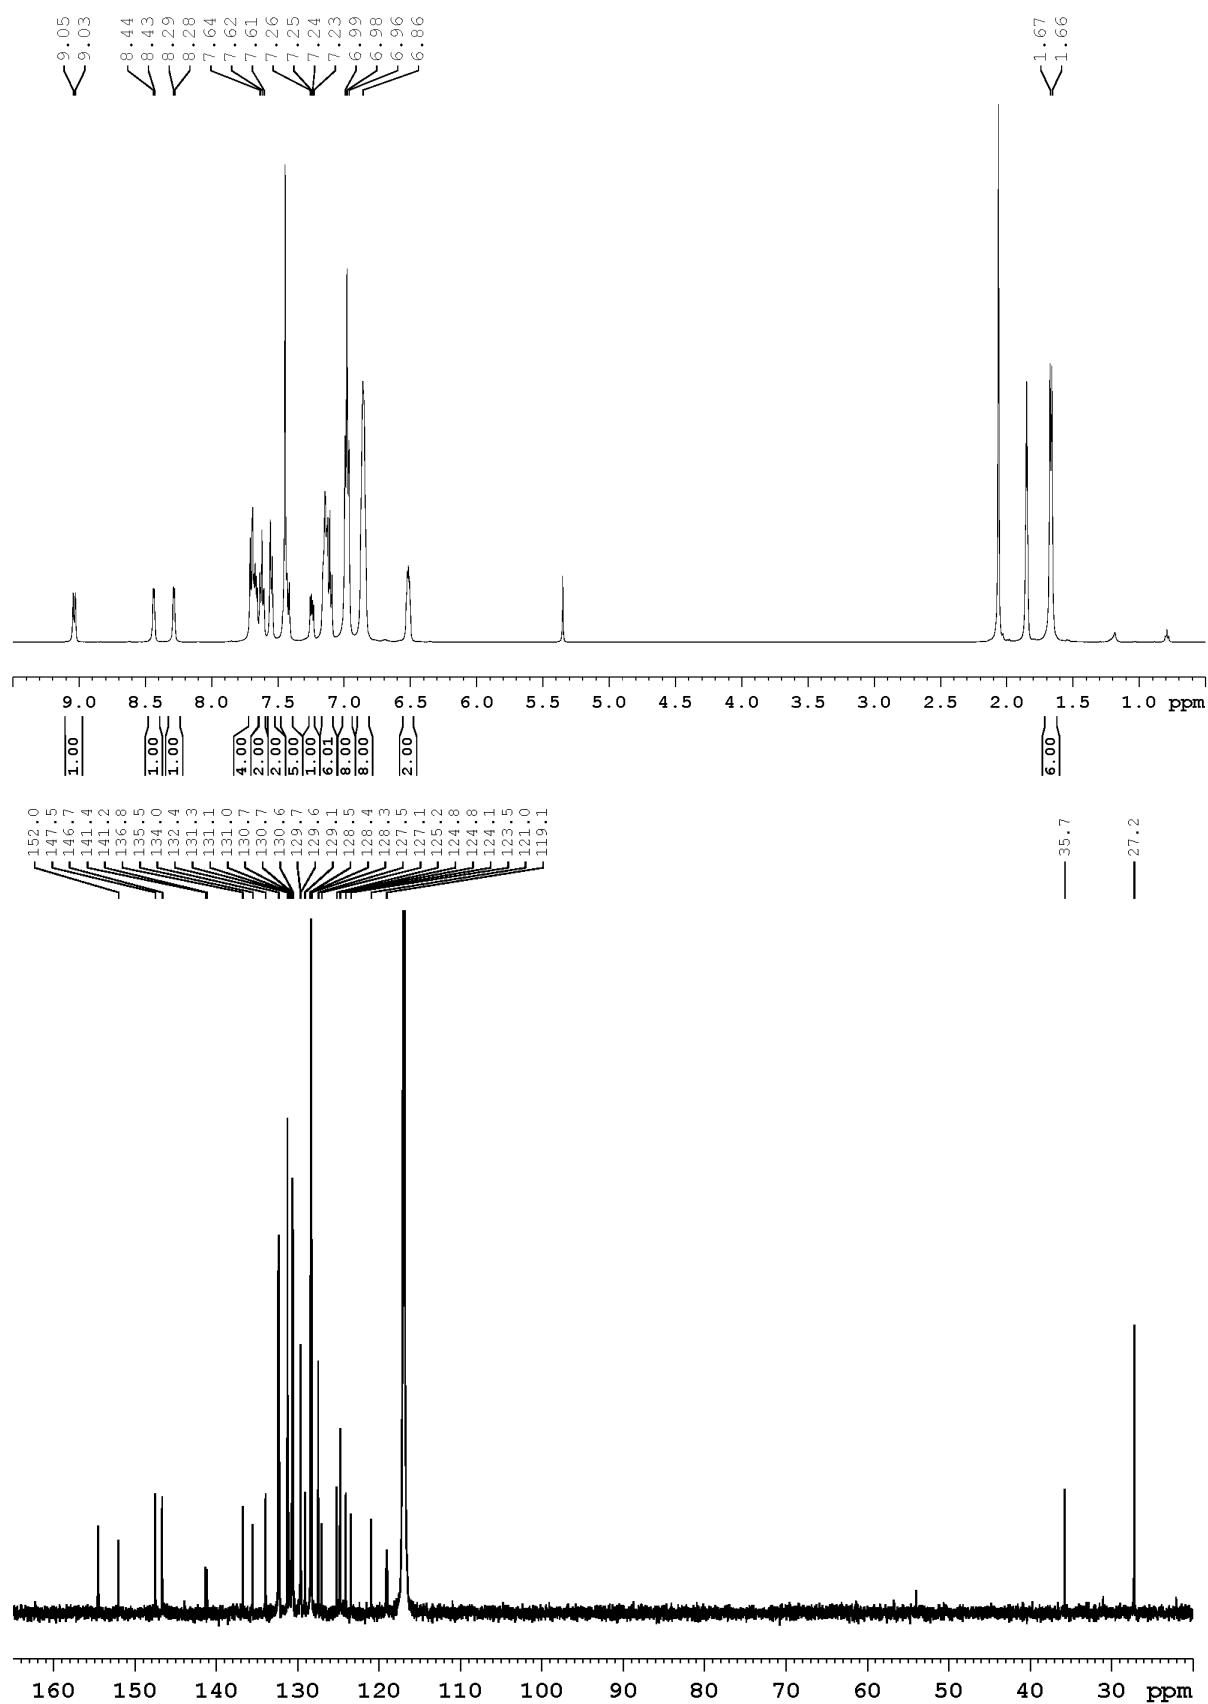

**Figure S2.** Presentation of the <sup>1</sup>H-NMR (top, 500 MHz) and <sup>13</sup>C-NMR (bottom, 126 MHz) spectra of C2 in CD<sub>3</sub>CN.

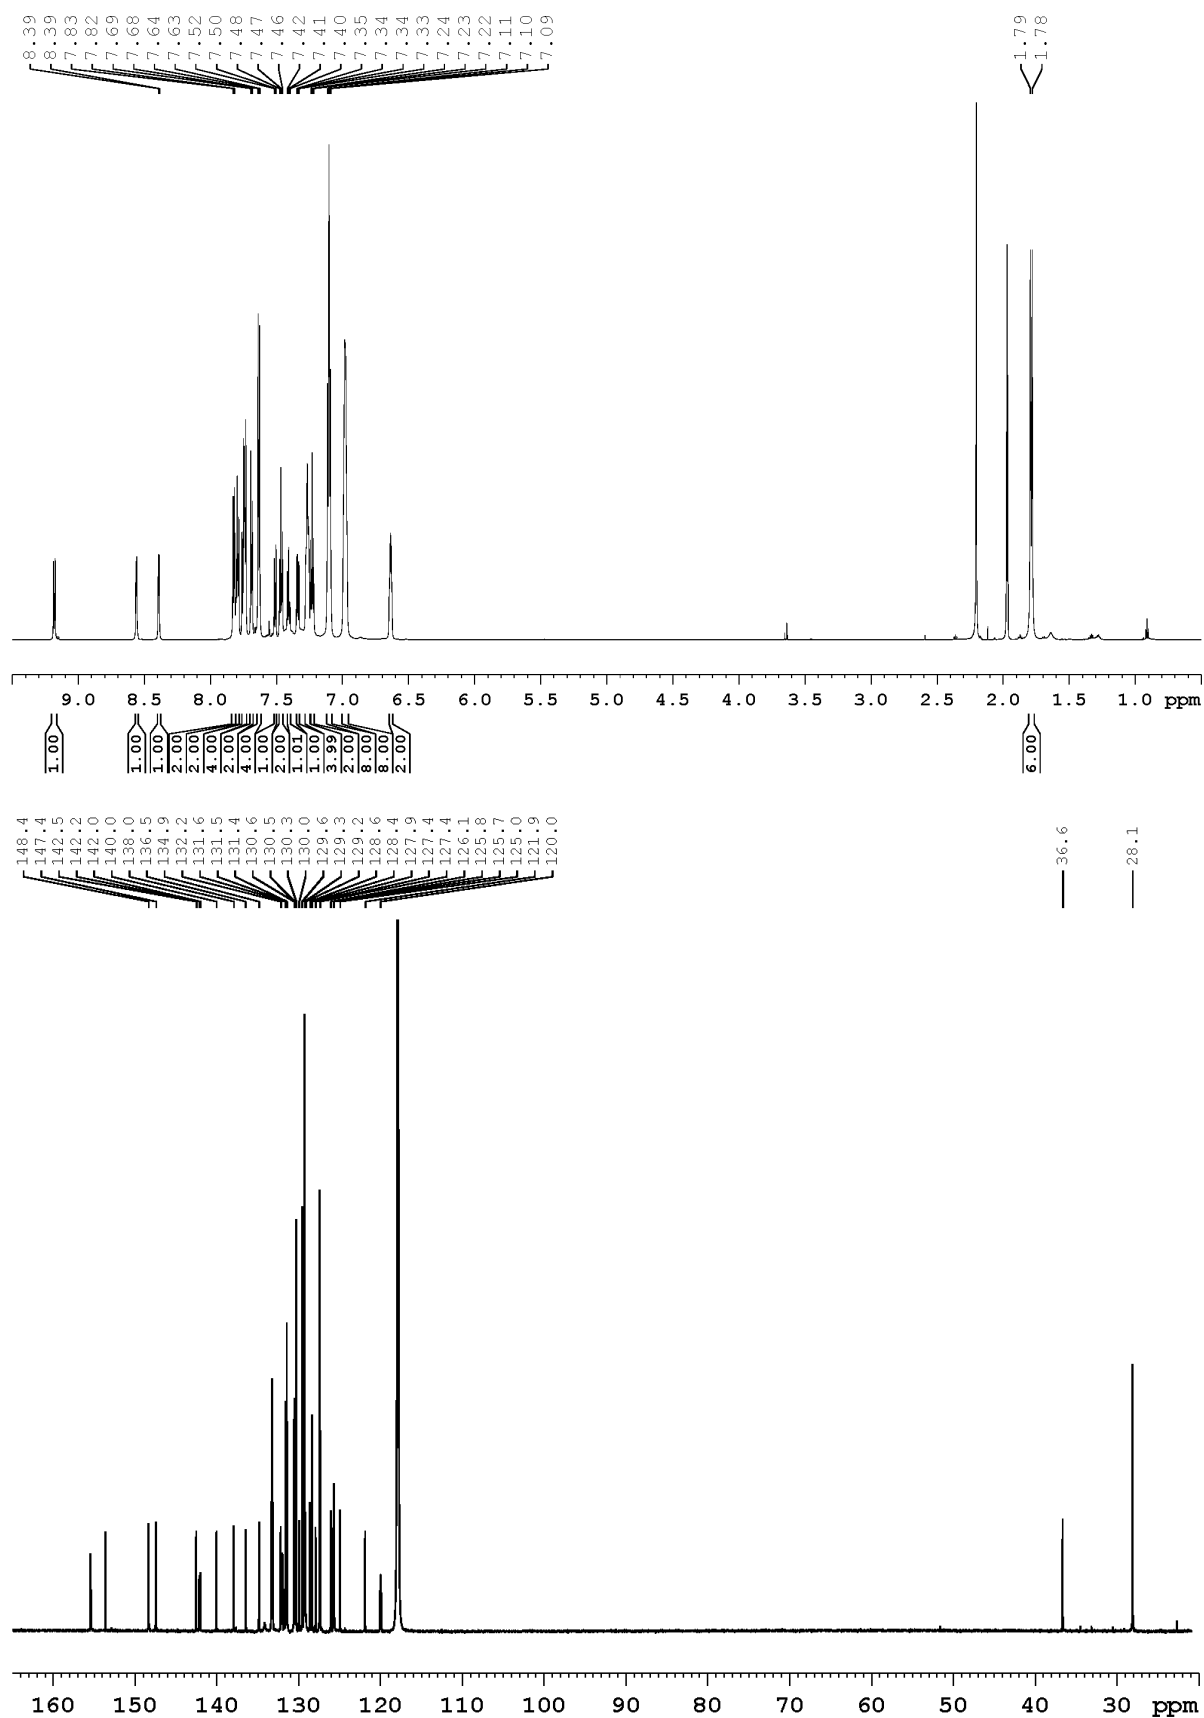

**Figure S3.** Presentation of the <sup>1</sup>H-NMR (top, 700 MHz) and <sup>13</sup>C-NMR (bottom, 176 MHz) spectra of C3 in CD<sub>3</sub>CN.

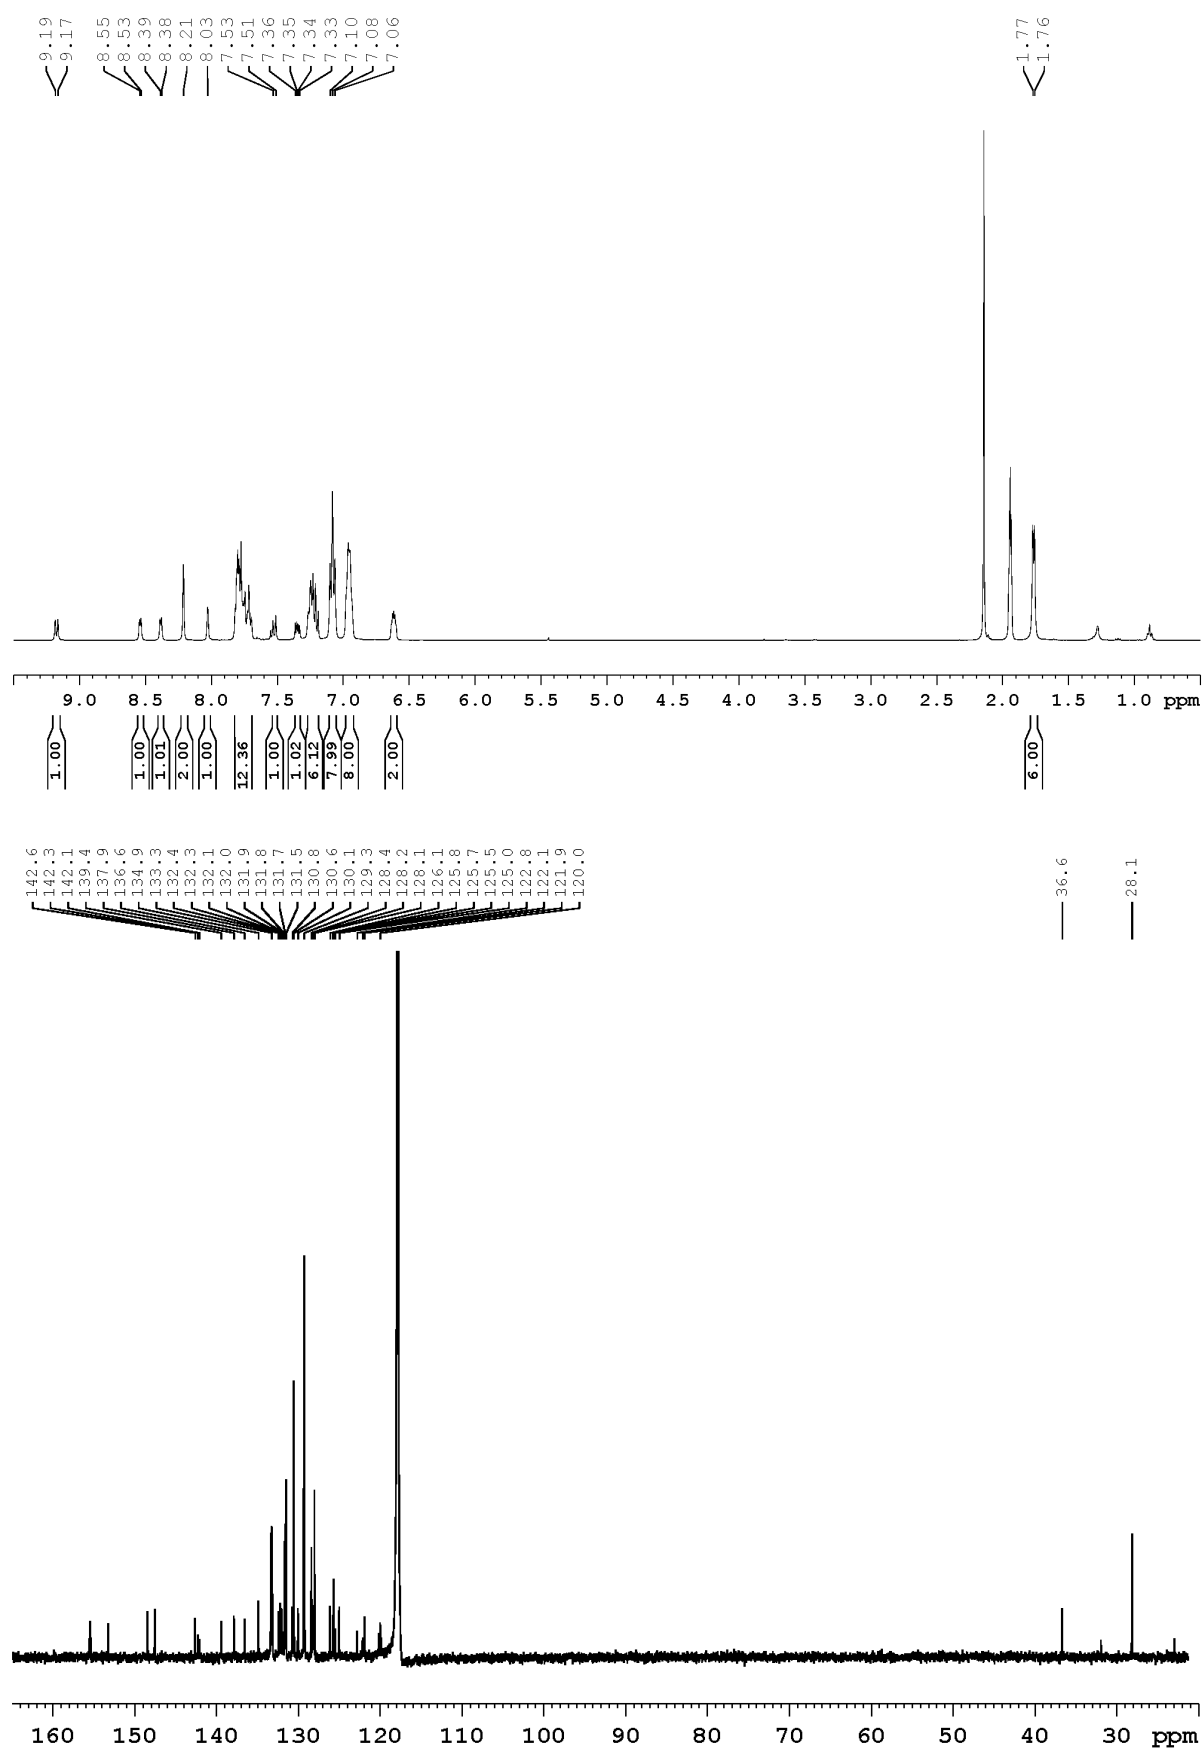

**Figure S4.** Presentation of the <sup>1</sup>H-NMR (top, 400 MHz) and <sup>13</sup>C-NMR (bottom, 101 MHz) spectra of C4 in CD<sub>3</sub>CN.

## 2. Mass Spectra of the Complexes C1–C4

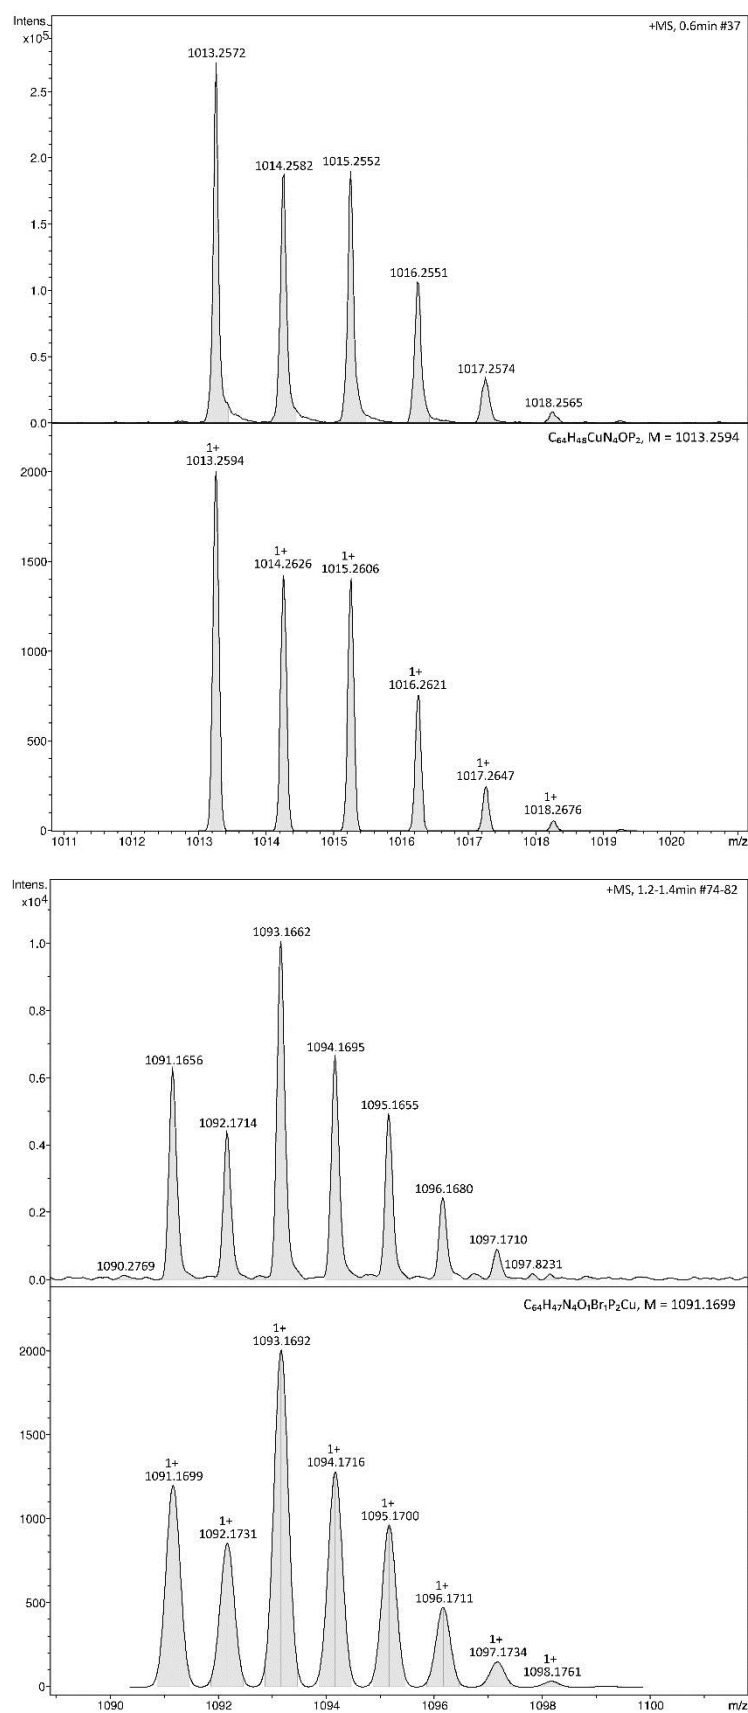

**Figure S5.** High resolution ESI mass spectra of the complexes C1 (top) and C2 (bottom) with matching isotopic pattern.

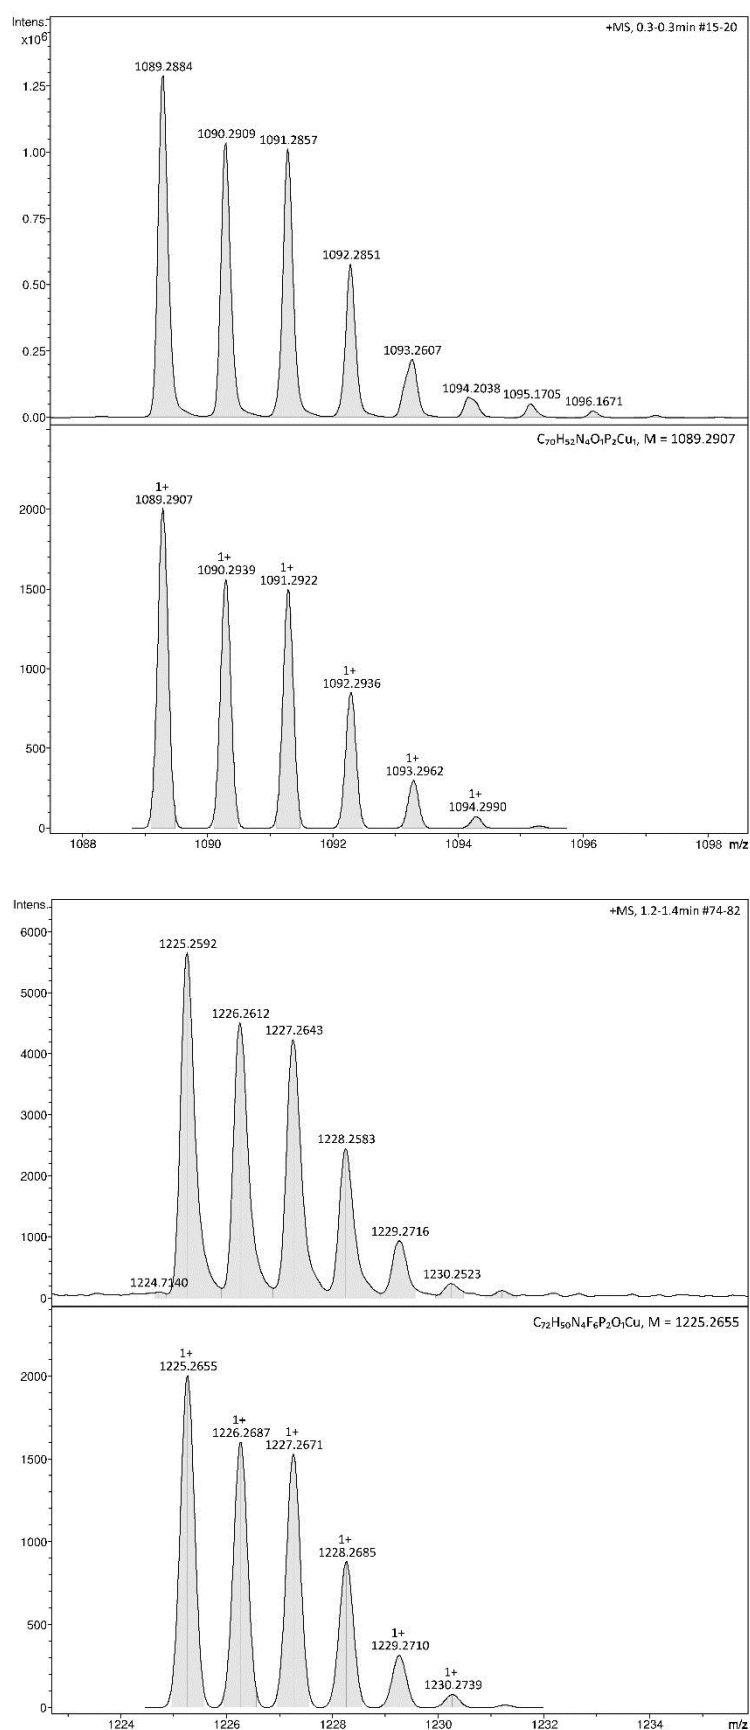

**Figure S6.** High resolution ESI mass spectra of the complexes C3 (top) and C4 (bottom) with matching isotopic pattern.

### 3. Crystallographic Data and Structures of C1 and C2

**Table S1.** Crystallographic data and refinement details of the heteroleptic copper complexes **C1** and **C2**.

| Compound                                         | C1                                                                                              | C2                                                                                                |
|--------------------------------------------------|-------------------------------------------------------------------------------------------------|---------------------------------------------------------------------------------------------------|
| CCDC number #                                    | 187 5532                                                                                        | 187 5530                                                                                          |
| Empirical formula                                | C <sub>65</sub> H <sub>50</sub> Cl <sub>2</sub> CuF <sub>6</sub> N <sub>4</sub> OP <sub>3</sub> | C <sub>65</sub> H <sub>49</sub> BrCl <sub>2</sub> CuF <sub>6</sub> N <sub>4</sub> OP <sub>3</sub> |
| Formula weight (g mol <sup>-1</sup> )            | 1244.44                                                                                         | 1323.34                                                                                           |
| Temperature (K)                                  | 130(2)                                                                                          | 130(2)                                                                                            |
| Wavelength (Å)                                   | 0.71073                                                                                         | 0.71073                                                                                           |
| Crystal system, space group                      | Monoclinic, P2(1)/n                                                                             | Monoclinic, P 21/c                                                                                |
| Unit cell dimensions (Å, °)                      |                                                                                                 |                                                                                                   |
| a                                                | 12.1254(10)                                                                                     | 9.8687(8)                                                                                         |
| b                                                | 13.9304(12)                                                                                     | 27.521(2)                                                                                         |
| c                                                | 40.007(3)                                                                                       | 21.7494(17)                                                                                       |
| α                                                | 90                                                                                              | 90                                                                                                |
| β                                                | 93.564(4)                                                                                       | 95.369(2)                                                                                         |
| γ                                                | 90                                                                                              | 90                                                                                                |
| Volume (Å <sup>3</sup> )                         | 6744.6(10)                                                                                      | 5881.2(8)                                                                                         |
| Z, calculated density (Mg m <sup>-3</sup> )      | 4, 1.226                                                                                        | 4, 1.495                                                                                          |
| Absorption coefficient (mm <sup>-1</sup> )       | 0.532                                                                                           | 1.290                                                                                             |
| F(000)                                           | 2552                                                                                            | 2688                                                                                              |
| Crystal size (mm)                                | 0.306 × 0.212 × 0.188                                                                           | 0.22 × 0.05 × 0.05                                                                                |
| Theta range for data collection (°)              | 1.548 to 25.473                                                                                 | 1.48 to 25.07                                                                                     |
| Limiting indices                                 | -14 ≤ h ≤ 14, -16 ≤ k ≤ 15,<br>-45 ≤ l ≤ 48                                                     | -11 ≤ h ≤ 11, -32 ≤ k ≤ 24,<br>-22 ≤ l ≤ 25                                                       |
| Reflections collected / unique                   | 39834 / 12284<br>[R(int) = 0.0732]                                                              | 40422 / 10384<br>[R(int) = 0.1441]                                                                |
| Completeness to theta = 25.242 (%)               | 98.9                                                                                            | 99.4                                                                                              |
| Absorption correction                            | Numerical                                                                                       | Semi-empirical from equivalents                                                                   |
| Max. and min. transmission                       | 0.7277 and 0.4801                                                                               | 0.7452 and 0.6284                                                                                 |
| Refinement method                                | Full-matrix least-squares on F <sup>2</sup>                                                     | Full-matrix least-squares on F <sup>2</sup>                                                       |
| Data / restraints / parameters                   | 12284 / 54 / 741                                                                                | 10384 / 0 / 751                                                                                   |
| Goodness-of-fit on F <sup>2</sup>                | 1.047                                                                                           | 1.036                                                                                             |
| Final R indices [I > 2σ(I)]                      | R1 = 0.1232, wR2 = 0.2599                                                                       | R1 = 0.0700, wR2 = 0.0918                                                                         |
| R indices (all data)                             | R1 = 0.1986, wR2 = 0.2824                                                                       | R1 = 0.1811, wR2 = 0.1047                                                                         |
| Largest diff. peak and hole (e.Å <sup>-3</sup> ) | 0.749 and -0.869                                                                                | 0.690 and -0.675                                                                                  |

# CCDC 1875532 (**C1**) and 1875530 (**C2**) contain the supplementary crystallographic data for this paper. These data can be obtained free of charge by the Cambridge Crystallographic Data Centre via <http://www.ccdc.cam.ac.uk/conts/retrieving.html>



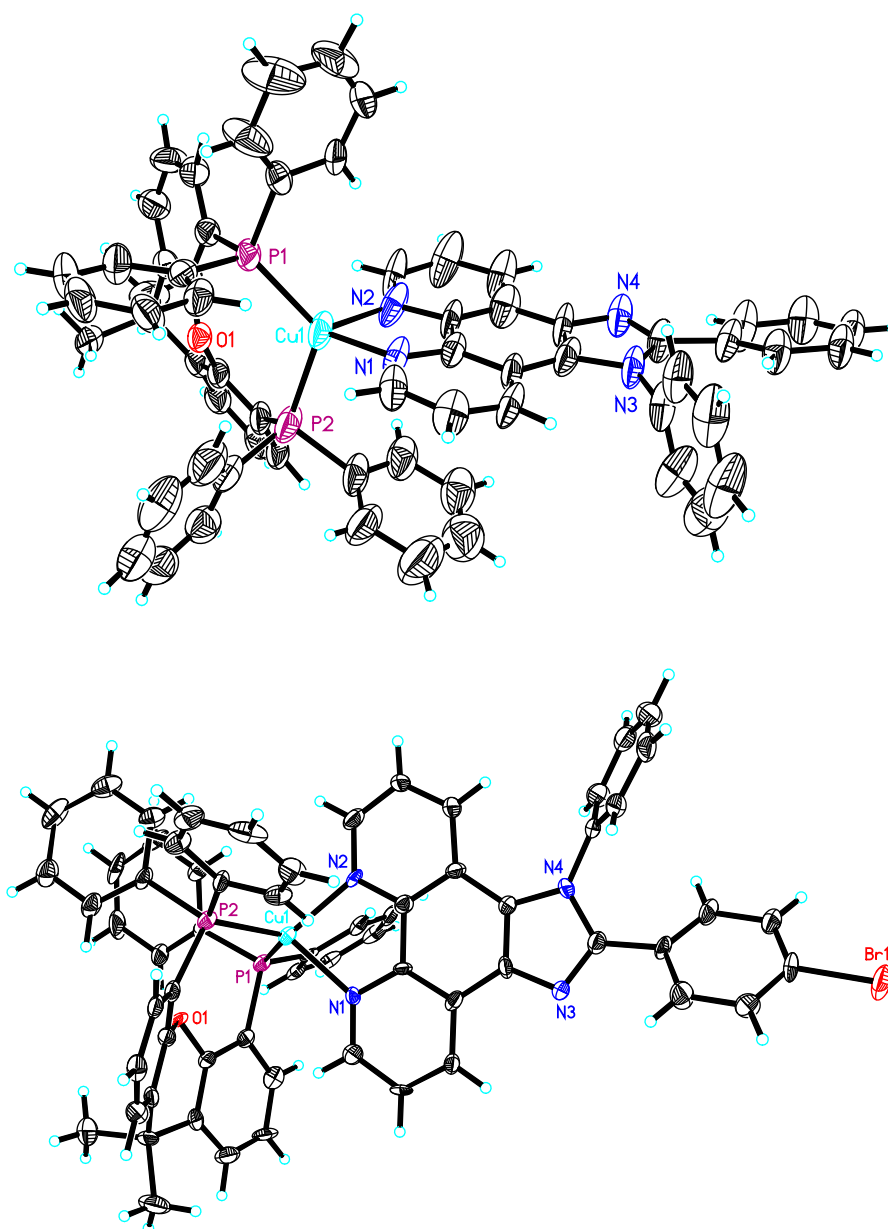

**Figure S7.** Comparison of the solid-state structures (ORTEP representation) of the complexes C1 (top) and C2 (bottom) with thermal ellipsoids at a probability level of 50%. The  $\text{PF}_6^-$  counter anion is omitted for clarity in both cases. In contrast to Figure 4 of the main text all hydrogen atoms are shown and a different orientation of the molecules are presented.

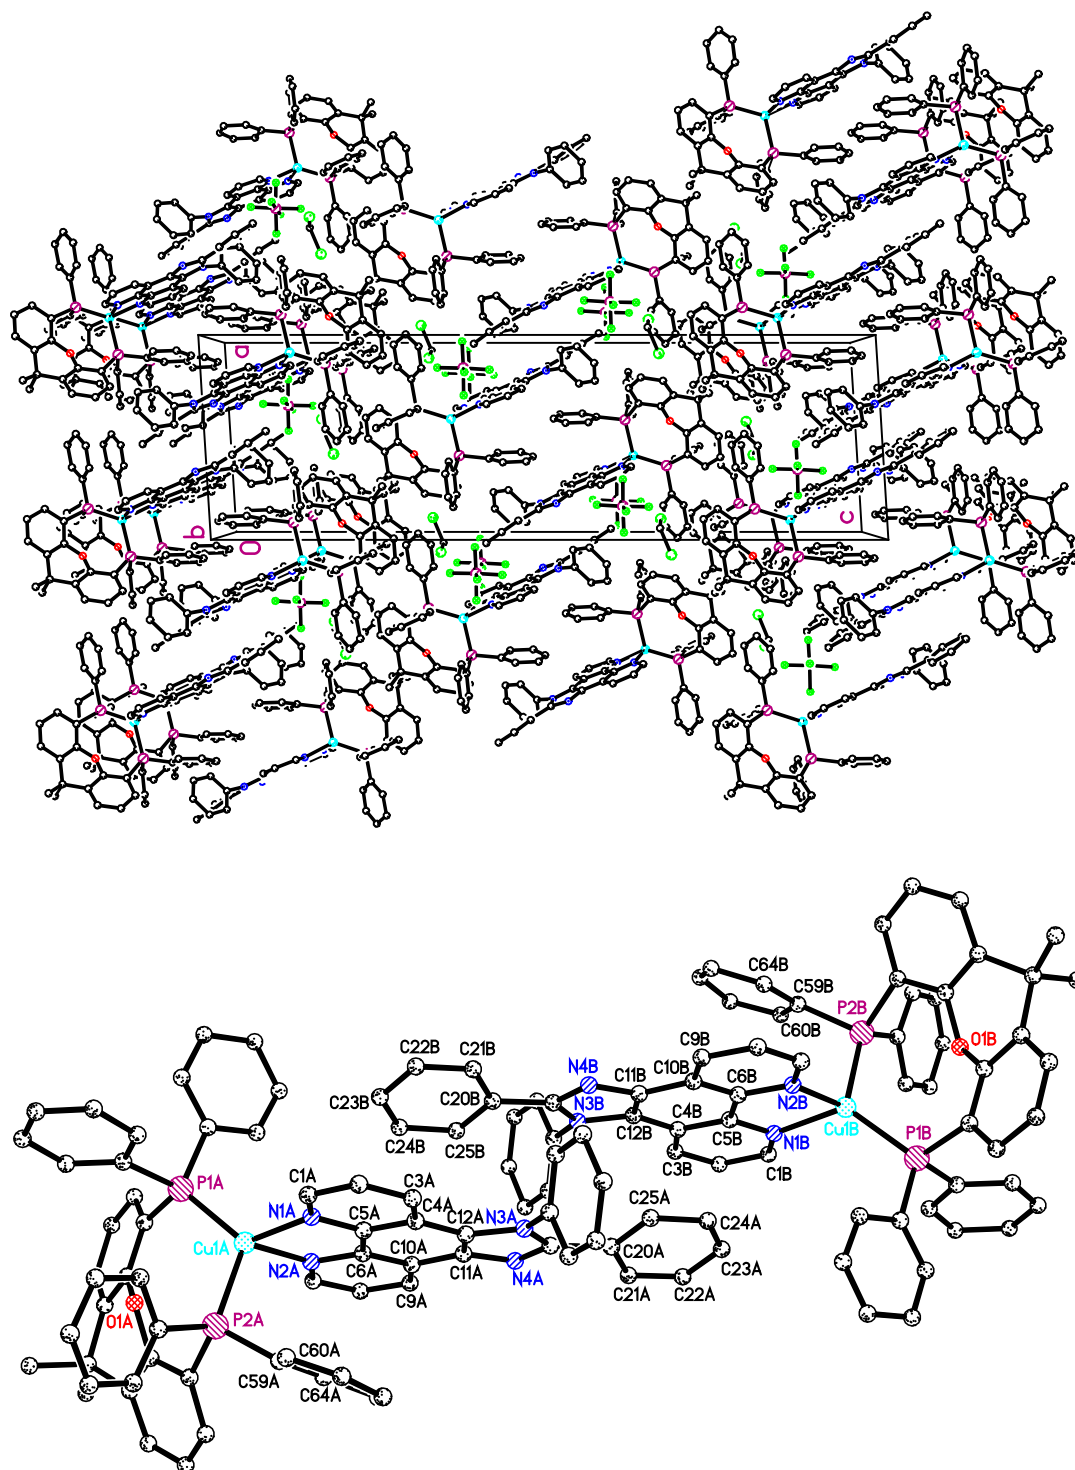

**Figure S8.** ORTEP representation of the unit cell of complex **C1** (top). The hydrogen atoms and  $\text{PF}_6^-$  counter ions are omitted for clarity. In the solid state a pairwise stacking of the complex **C1** is found, which is caused by  $\pi$ - $\pi$ -interactions between the phenyl ring of **L1** of neighboring complexes. The distance between the two neighboring imidazo-phenanthroline ligands is about 3.3 to 3.8 Å. The bottom picture shows an enlargement of the packing situation.

#### 4. Emission Lifetimes of the Complexes C1–C4 and R1

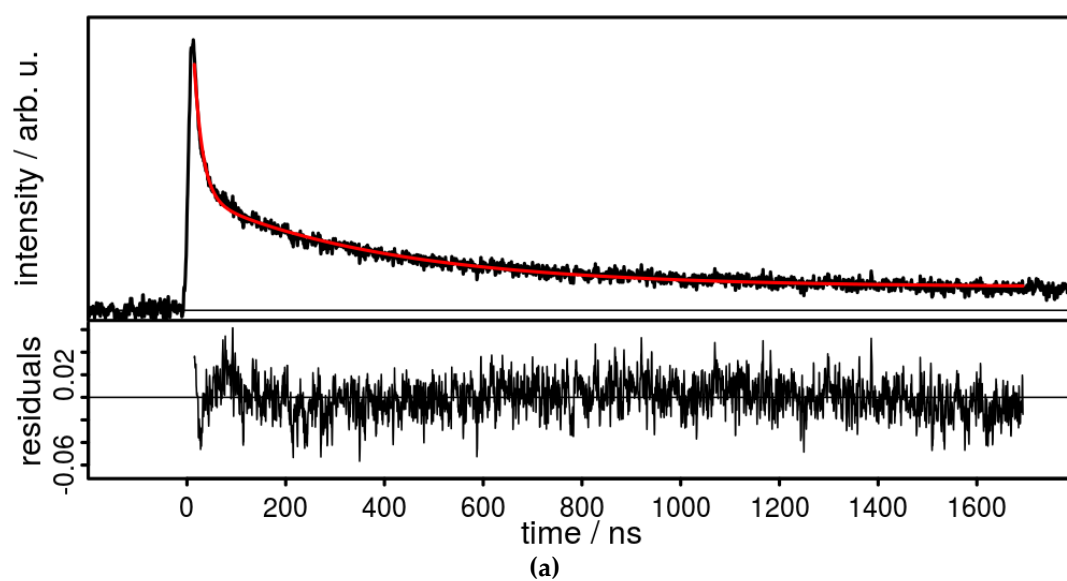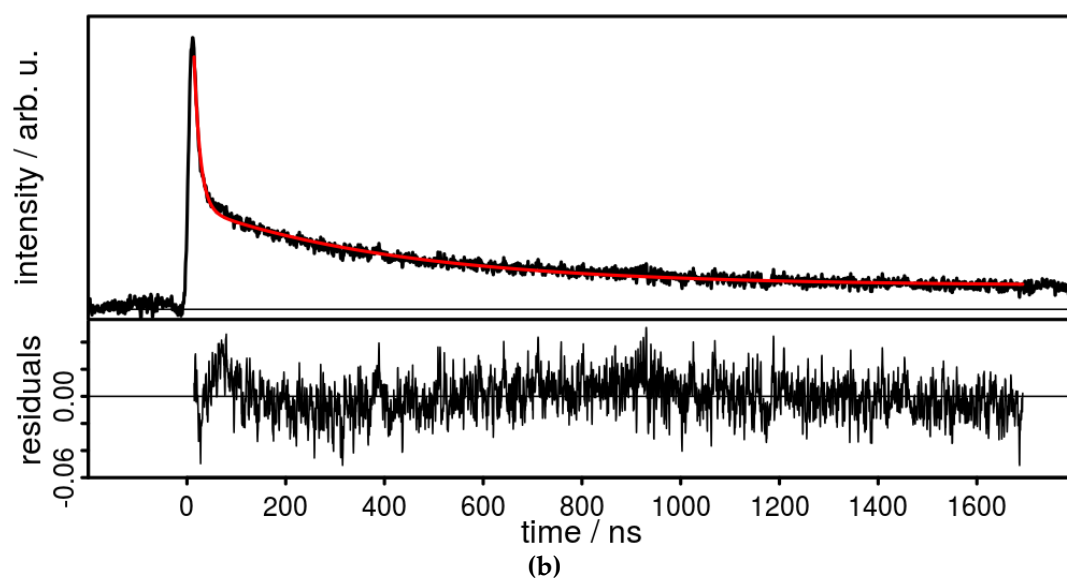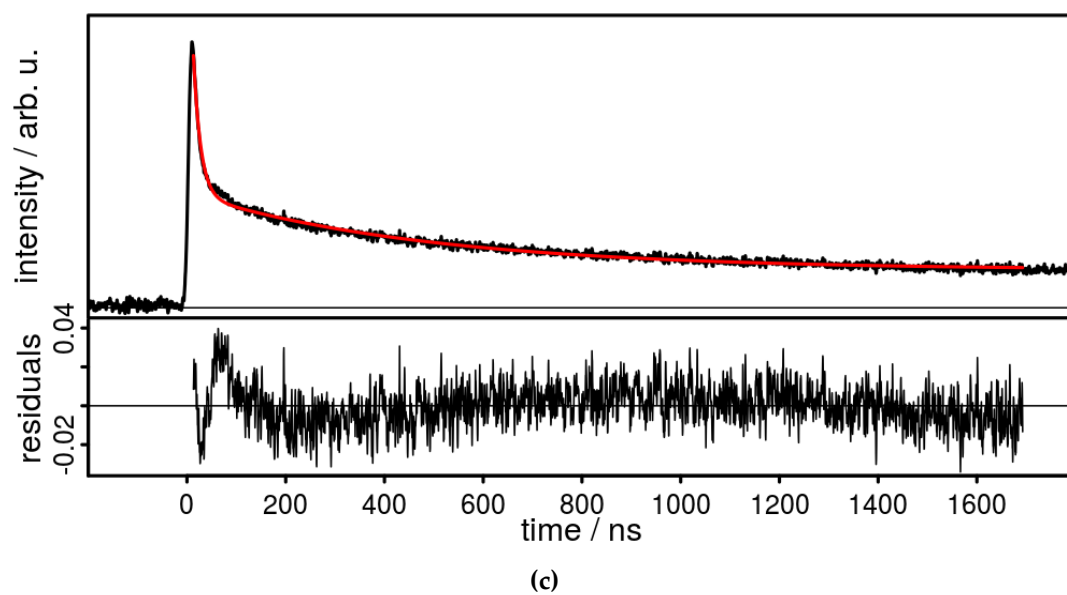

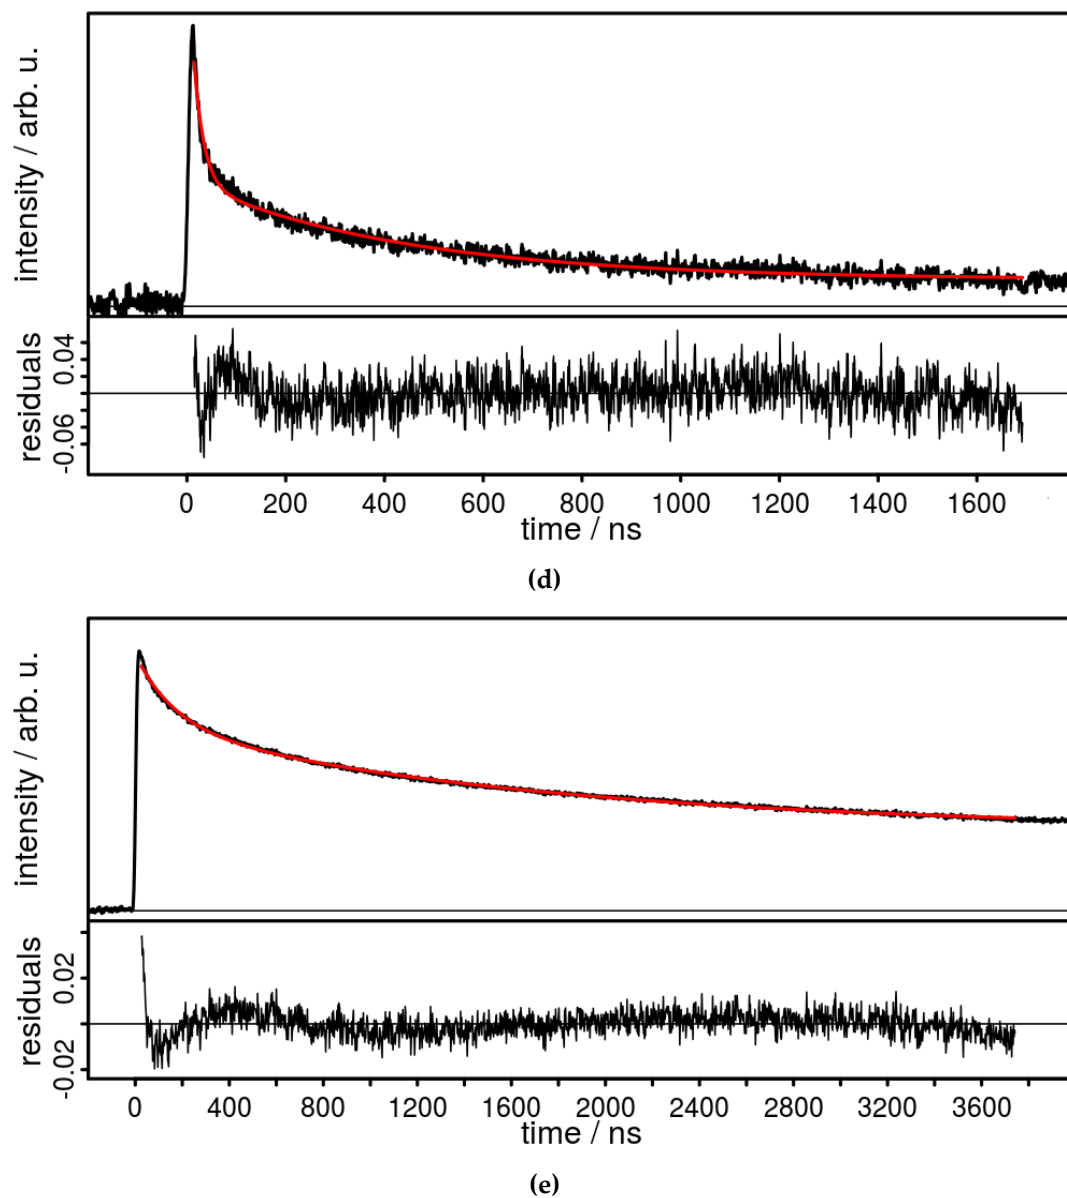

**Figure S9.** Emission lifetime measurements of the complexes **C1-C4** (panels **(a)-(d)**) and the reference **R1** (panel **(e)**). All spectra were detected of the solid samples at room temperature. The black line in the upper part of each panel is the emission intensity decay over time, respectively. The red line represents the double exponential fit of the lifetimes (the corresponding time constants are reported in the main manuscript - Table 2). In the lower half of each panel the residuals of the fit are depicted.
